# Supplementary material
Source: HighWire-hosted journal article supplement (http://www.cmaj.ca/highwire/filestream/81410/field_highwire_adjunct_files/0/211491-res-1-at.pdf)

## Supplemental material

**Table S1.** Sensitivity analyses

| Model                                                                                                                                                                                                                                                                                                                                                                                                                                                                                         | Estimated risk of ADHD in infants born just before vs just after 34+0 weeks gestation |                                                             |
|-----------------------------------------------------------------------------------------------------------------------------------------------------------------------------------------------------------------------------------------------------------------------------------------------------------------------------------------------------------------------------------------------------------------------------------------------------------------------------------------------|---------------------------------------------------------------------------------------|-------------------------------------------------------------|
|                                                                                                                                                                                                                                                                                                                                                                                                                                                                                               | Rate ratio [95% CI]                                                                   | Excess cases per 100 births by age 13 <sup>a</sup> [95% CI] |
| At least one dispensation (primary analysis)                                                                                                                                                                                                                                                                                                                                                                                                                                                  | 1.12 [0.80, 1.57]                                                                     | 1.3 [-2.5, 5.7]                                             |
| Multiple dispensations                                                                                                                                                                                                                                                                                                                                                                                                                                                                        | 1.14 [0.74, 1.68]                                                                     | 1.3 [-3.1, 5.6]                                             |
| Adjusting for male sex <sup>b</sup>                                                                                                                                                                                                                                                                                                                                                                                                                                                           | 1.11 [0.75, 1.55]                                                                     | 1.1 [-1.6, 3.5]                                             |
| 14-day window                                                                                                                                                                                                                                                                                                                                                                                                                                                                                 | 1.29 [0.85, 1.92]                                                                     | 2.9 [-1.7, 8.5]                                             |
| 7-day window                                                                                                                                                                                                                                                                                                                                                                                                                                                                                  | 2.45 [1.30, 4.44]                                                                     | 12.0 [3.2, 25.2]                                            |
| Model-selected optimal age window <sup>c</sup>                                                                                                                                                                                                                                                                                                                                                                                                                                                | -                                                                                     | 0.8 [-3.3, 4.9]                                             |
| <sup>a</sup> absolute difference in cumulative risk by age 13<br><sup>b</sup> further inclusion of an interaction term between male sex and pre/post discontinuity status was not statistically significant (p-value 0.38, calculated from the bootstrapped confidence intervals using the approach of Altman & Bland <i>BMJ</i> . 2011;343:d2304.<br><sup>c</sup> linear regression model for at least one dispensation at any point in follow-up, model-selected optimal window of 5.3 days |                                                                                       |                                                             |

**Figure S1.** Illustration of the regression discontinuity design using the example of neonatal respiratory morbidity/mortality among 16,358 children in British Columbia, Canada, admitted for the delivery admission just before and just after the clinical cut-off for antenatal corticosteroid administration of 34+0 weeks, 2000-2013. Light grey shading indicates the gestational ages in which routine antenatal corticosteroid administration is recommended. Circles indicate observed day-specific values, solid line indicates the smoothed estimate of risk from the regression discontinuity model, and dashed line indicates the risk in neonatal respiratory morbidity/mortality in the absence of any change in antenatal corticosteroid administration practices at 34+0 weeks. The effect of antenatal corticosteroid administration is estimated as the difference between the solid and dashed lines at 34+0 weeks.

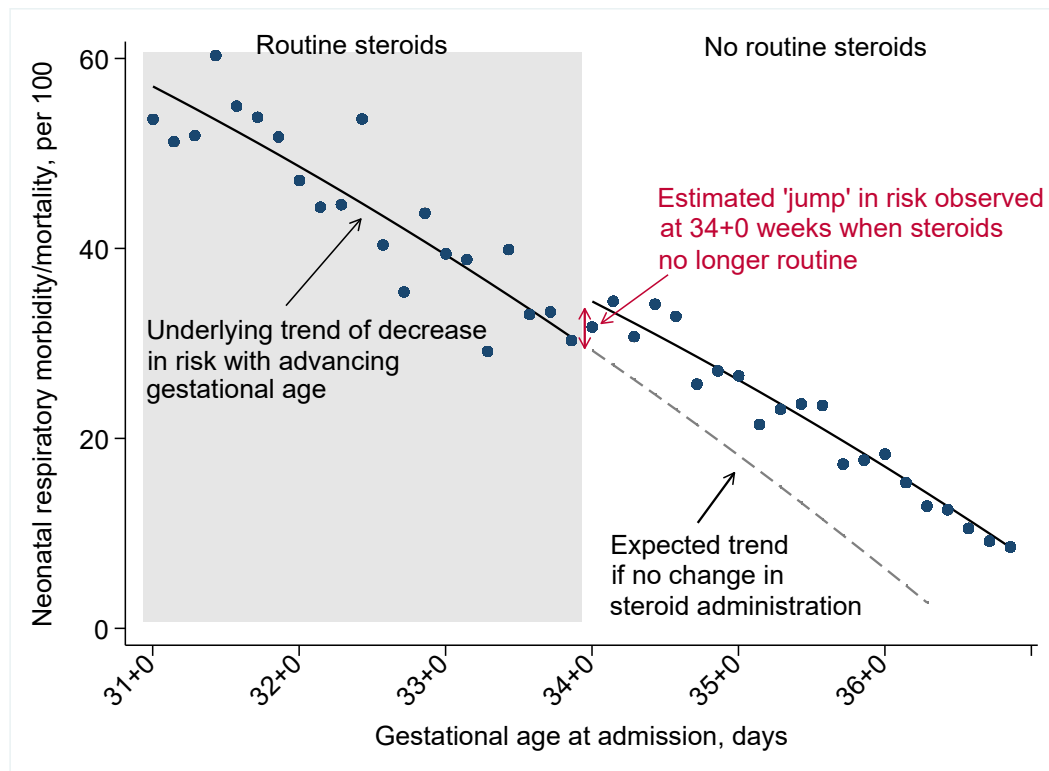

**Figure S2.** Maternal and fetal characteristics by day of gestation. Vertical dashed line indicates 34+0 weeks' gestation.

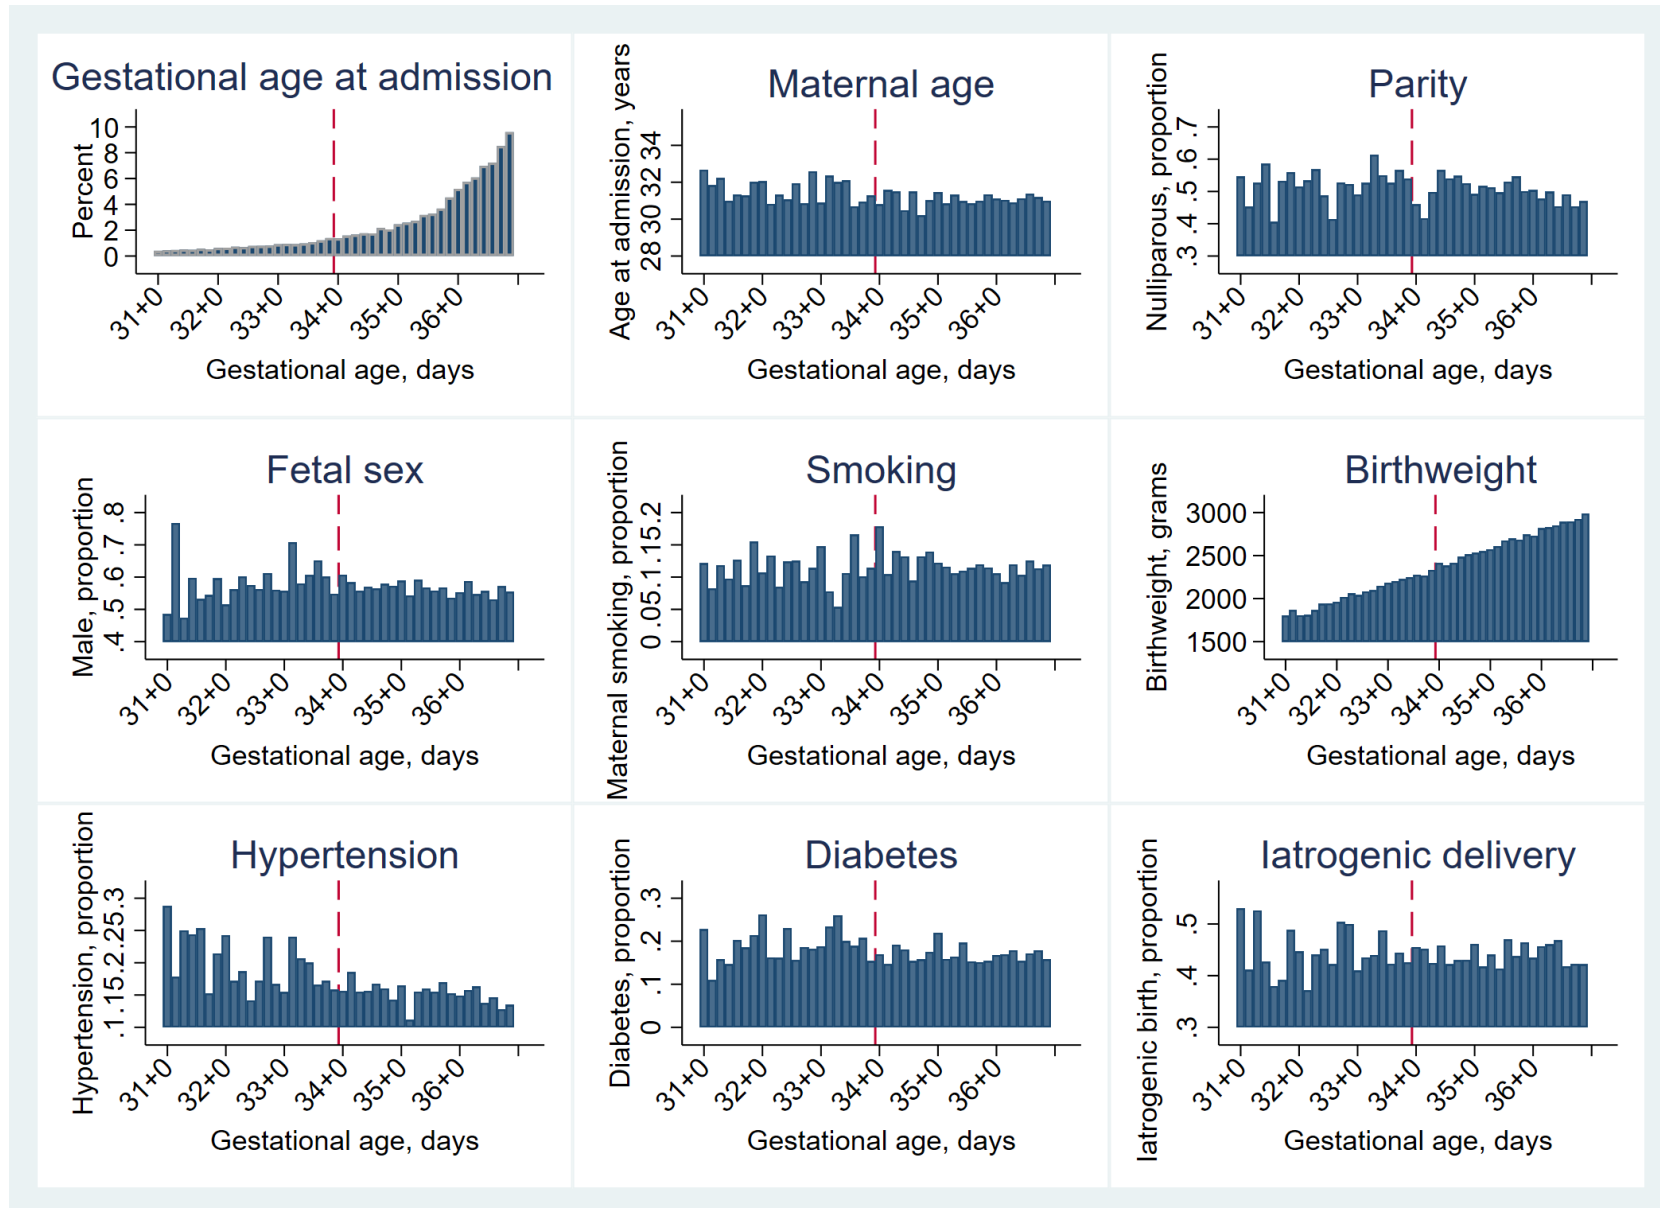

**Figure S3.** Regression discontinuity estimates when limiting the gestational age window to 7 days.

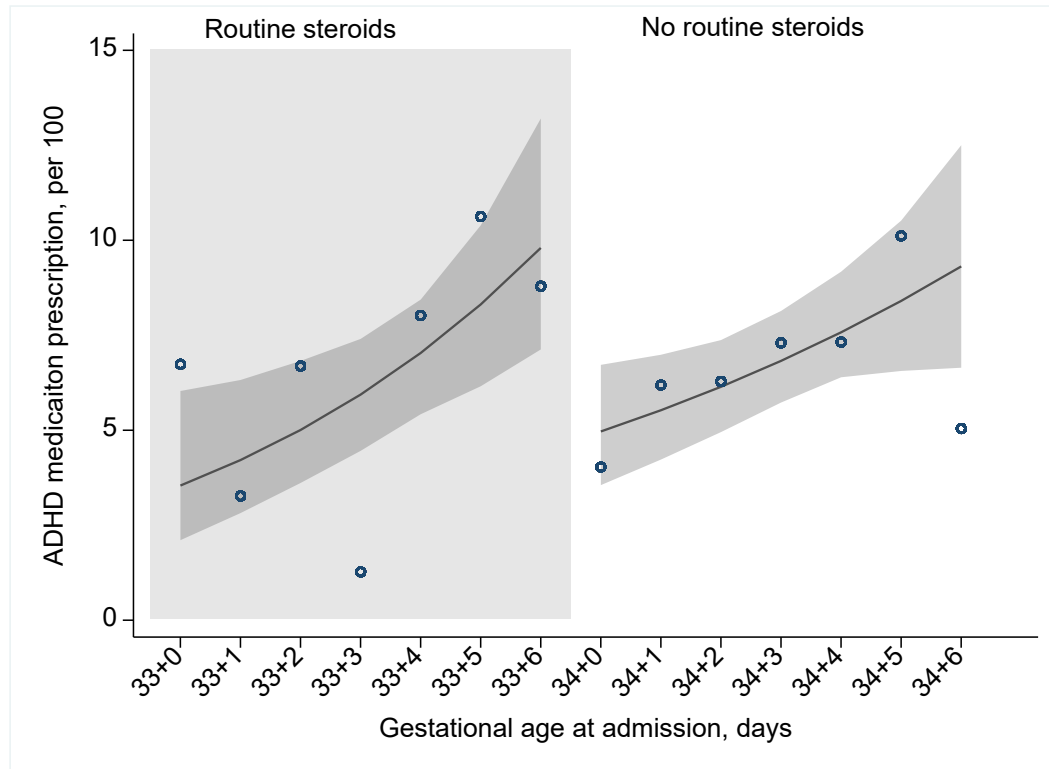

Supplement: 211491-res-1-at.pdf [file 211491-res-1-at.pdf]
